# Supplementary material for: Hydroethanolic Extract of Solanum paniculatum L. Fruits Modulates ROS and Cytokine in Human Cell Lines
Source: Hindawi journal article supplement (doi:10.1155/2020/7240216), 2020-01-22
Supplement: f1 [file 7240216.f1.pdf]

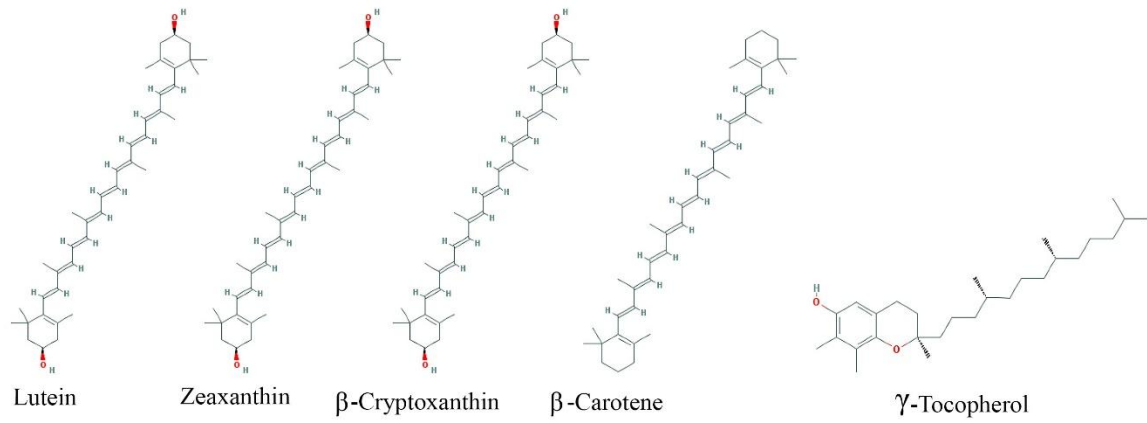

Figure S1: Molecules Structures of Carotenoides.

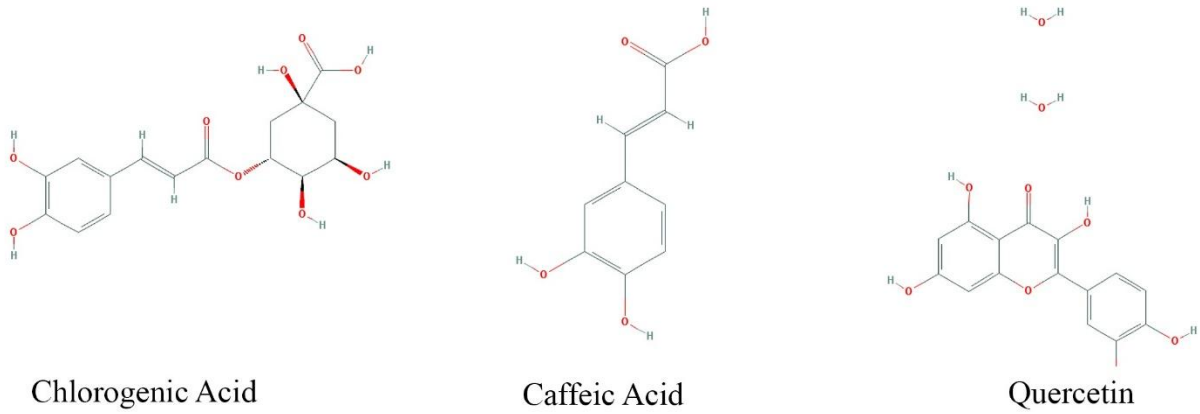

Figure S2: Molecules Structures of Phenolic Compounds.
